# Supplementary material for: Gene panel screening for insight towards breast cancer susceptibility in different ethnicities
Source: PLoS One. 2020 Aug 31;15(8):e0238295. doi: 10.1371/journal.pone.0238295 (PMC7458311; doi:10.1371/journal.pone.0238295)
Supplement: S1 Table — (XLSX) [file pone.0238295.s001.xlsx]

## Sheet: S1 Table
S1 Table. Summary of coverage for the fourteen assessed genes from the B.O.P. panel.
Gene or targeted regions		Accession number	# of targeted regions	Size (bp)	Average sequencing depth (X)	Interquartile range (X)			% bases covered greater than or equal to:
						First quartile	Median	Third quartile	1X	10X	20X	50X	100X	250X	500X	1000X	5000X	10000X
Genes investigated for analytical validation	ATM	NM_000051	65	15545	735	327	620	1008	97.7	96.5	95.2	91.8	86.1	70.2	48.8	22.6	0.7	0.3
	BARD1	NM_000465	13	6329	847	428	757	1131	99.2	98.2	97.2	93.8	88.3	74.6	56.8	28.4	0.8	0.5
	BRCA1	NM_007300	24	7750	970	382	734	1242	98.1	97.6	96.9	94	88.8	74.2	55.1	31	1.2	0.5
	BRCA2	NM_000059	28	12078	915	434	780	1203	98.7	98.2	97.6	95.1	90.4	77.1	57.6	30.4	1	0.5
	BRIP1	NM_032043	20	8566	692	305	624	984	95.3	93.8	92.7	89.2	83.5	68.1	48	21.6	0.7	0.3
	CDH1	NM_004360	16	5269	864	374	748	1180	98.5	97.6	96.7	94	89.1	74.1	54.5	28.8	0.8	0.4
	CHEK2	NM_001005735	23	4605	665	258	541	933	96.1	94.4	93	88.4	81.2	64.7	43.9	19.3	0.9	0.3
	NBN	NM_002485	22	6681	685	315	594	950	97.7	96.5	95	90.6	84.3	68.6	46.9	20.8	0.7	0.2
	PALB2	NM_024675	13	4318	932	508	804	1219	99.9	99.4	98.9	96.7	92.3	80.6	60.9	31.2	0.9	0.4
	PTEN	NM_000314	10	10248	554	201	435	795	97.1	94.2	92	85.8	77.2	58.5	36.6	14.8	0.6	0.2
	RAD51C	NM_058216	11	3173	751	360	653	1016	99.6	98.5	97.4	93.4	87.4	72	51.3	23.3	0.7	0.3
	RAD51D	NM_001142571	11	2803	787	398	729	1072	99.9	99.3	98.3	95.3	88.9	74.7	54	25.5	0.8	0.4
	STK11	NM_000455	10	3476	408	127	304	615	93.3	89.6	87.1	79.7	69.5	47.1	25.7	8.1	0.5	0.1
	TP53	NM_000546	14	4216	709	281	588	962	97.6	95.3	94.1	91	83.7	66.7	46.4	21.2	0.7	0.4
All targeted B.O.P. regions			1417	499521	745	327	628	1021	98.2	97	95.9	92.3	86.2	70.2	49.2	23	0.7	0.4
