# Supplementary material for: Gene panel screening for insight towards breast cancer susceptibility in different ethnicities
Source: PLoS One. 2020 Aug 31;15(8):e0238295. doi: 10.1371/journal.pone.0238295 (PMC7458311; doi:10.1371/journal.pone.0238295)
Supplement: S2 Table — (XLSX) [file pone.0238295.s002.xlsx]

## Sheet: S2 Table
S2 table. All true positive variants
Individual/sample	Age of onset	Ethnicity	Func.refGene	Gene.refGene	GeneDetail.refGene	ExonicFunc.refGene	AAChange.refGene	ACMG_category
1CA-a	34	EA	exonic;UTR5	PTEN	NM_001304718:c.-21147C>T	synonymous SNV	PTEN:NM_001304717:exon5:c.C753T:p.T251T;PTEN:NM_000314:exon4:c.C234T:p.T78T	Likely Benign
1CAB-a	60	EA	exonic	RAD51C	.	nonsynonymous SNV	RAD51C:NM_058216:exon2:c.G376A:p.A126T;RAD51C:NM_002876:exon2:c.G376A:p.A126T	Likely Benign
1CAC-a	52	AA	exonic;intronic	ATM;C11orf65	.	synonymous SNV	ATM:NM_000051:exon48:c.G7044A:p.T2348T	Likely Benign
1CAD-a	36	AA	exonic	BRCA2	.	nonsynonymous SNV	BRCA2:NM_000059:exon11:c.A5020G:p.S1674G	VUS
1CAD-a	36	AA	exonic	BRCA1	.	nonsynonymous SNV	BRCA1:NM_007297:exon19:c.T5183G:p.M1728R;BRCA1:NM_007298:exon19:c.T2012G:p.M671R;BRCA1:NM_007300:exon21:c.T5387G:p.M1796R;BRCA1:NM_007294:exon20:c.T5324G:p.M1775R;BRCA1:NM_007299:exon20:c.T2012G:p.M671R	Pathogenic
1CAF-a	50	AA	exonic;UTR5	CDH1	NM_001317185:c.-13913A>G;NM_001317186:c.-21598A>G	synonymous SNV	CDH1:NM_001317184:exon3:c.A324G:p.R108R;CDH1:NM_004360:exon3:c.A324G:p.R108R	Likely Benign
1CAF-a	50	AA	exonic;upstream	RAD51C;TEX14	.	nonsynonymous SNV	RAD51C:NM_058216:exon1:c.A28T:p.M10L;RAD51C:NM_002876:exon1:c.A28T:p.M10L	VUS
1CAG-a	45	AA	exonic	BRCA2	.	nonsynonymous SNV	BRCA2:NM_000059:exon10:c.T1798C:p.Y600H	Likely Benign
1CAH-a	43	AA	exonic	BRCA2	.	synonymous SNV	BRCA2:NM_000059:exon10:c.A1275G:p.E425E	Benign
1CAH-a	43	AA	exonic;intronic	BARD1	.	nonframeshift deletion	BARD1:NM_000465:exon4:c.1075_1095del:p.359_365del;BARD1:NM_001282543:exon3:c.1018_1038del:p.340_346del	Benign
1CAH-a	43	AA	exonic	BRIP1	.	synonymous SNV	BRIP1:NM_032043:exon16:c.T2286C:p.R762R	Benign
1CAH-a	43	AA	exonic;intronic;ncRNA_intronic	RAD51D;RAD51L3-RFFL	.	nonsynonymous SNV	RAD51D:NM_001142571:exon3:c.T251A:p.L84H	Likely Benign
1CAH-a	43	AA	exonic	BRCA2	.	nonsynonymous SNV	BRCA2:NM_000059:exon11:c.G6323A:p.R2108H	Benign
1CAI-a	39	AA	exonic	ATM	.	nonsynonymous SNV	ATM:NM_000051:exon3:c.C146G:p.S49C	Likely Benign
1CAI-a	39	AA	exonic	PALB2	.	synonymous SNV	PALB2:NM_024675:exon4:c.A1419C:p.P473P	Likely Benign
1CAI-a	39	AA	exonic;intronic	CDH1	.	synonymous SNV	CDH1:NM_001317185:exon11:c.G132C:p.T44T;CDH1:NM_001317184:exon10:c.G1497C:p.T499T;CDH1:NM_004360:exon11:c.G1680C:p.T560T	Likely Benign
1CB-a	36	AA	exonic	BRCA2	.	frameshift deletion	BRCA2:NM_000059:exon11:c.5611_5615del:p.S1871fs	Pathogenic
1CBA-a	51	AA	exonic	PALB2	.	synonymous SNV	PALB2:NM_024675:exon5:c.A2256G:p.G752G	Likely Benign
1CBA-a	51	AA	exonic;intronic;ncRNA_intronic	RAD51D;RAD51L3-RFFL	.	synonymous SNV	RAD51D:NM_001142571:exon3:c.C159T:p.H53H	Likely Benign
1CBA-a	51	AA	exonic	BRCA2	.	nonsynonymous SNV	BRCA2:NM_000059:exon11:c.A6347G:p.H2116R	Likely Benign
1CBB-a	42	EA	exonic;intronic	ATM;C11orf65	.	nonsynonymous SNV	ATM:NM_000051:exon59:c.C8596T:p.L2866F	VUS
1CBC-a	42	AA	exonic	ATM	.	nonsynonymous SNV	ATM:NM_000051:exon13:c.T2119C:p.S707P	Benign
1CBE-a	32	EA	exonic	BRCA2	.	synonymous SNV	BRCA2:NM_000059:exon11:c.C5199T:p.S1733S	Likely Benign
1CBF-a	56	EA	exonic;intronic	ATM;C11orf65	.	synonymous SNV	ATM:NM_000051:exon39:c.T5793C:p.A1931A	Likely Benign
1CBF-a	56	EA	exonic;intronic	ATM;C11orf65	.	nonsynonymous SNV	ATM:NM_000051:exon58:c.C8558T:p.T2853M	VUS
1CBH-a	32	AA	exonic;UTR5	CDH1	NM_001317185:c.-13913A>G;NM_001317186:c.-21598A>G	synonymous SNV	CDH1:NM_001317184:exon3:c.A324G:p.R108R;CDH1:NM_004360:exon3:c.A324G:p.R108R	Likely Benign
1CBH-a	32	AA	exonic;intronic	BARD1	.	synonymous SNV	BARD1:NM_000465:exon4:c.A609C:p.G203G;BARD1:NM_001282543:exon3:c.A552C:p.G184G	Likely Benign
1CBH-a	32	AA	exonic;intronic	BARD1	.	nonsynonymous SNV	BARD1:NM_000465:exon4:c.A764G:p.N255S;BARD1:NM_001282543:exon3:c.A707G:p.N236S	VUS
1CBI-a	62	EA	exonic	BRCA2	.	nonsynonymous SNV	BRCA2:NM_000059:exon11:c.T6317C:p.L2106P	Likely Benign
1CBJ-a	48	EA	exonic	BRCA2	.	nonsynonymous SNV	BRCA2:NM_000059:exon22:c.G8851A:p.A2951T	Likely Benign
1CC-a	48	AA	exonic	BRIP1	.	nonsynonymous SNV	BRIP1:NM_032043:exon20:c.A3439G:p.N1147D	VUS
1CC-a	48	AA	exonic	NBN	.	nonsynonymous SNV	NBN:NM_001024688:exon11:c.A976G:p.K326E;NBN:NM_002485:exon10:c.A1222G:p.K408E	Likely Benign
1CCA-a	43	EA	exonic	BRCA2	.	stopgain	BRCA2:NM_000059:exon27:c.A9976T:p.K3326X	Likely Benign
1CCB-a	43	AA	exonic	PALB2	.	synonymous SNV	PALB2:NM_024675:exon5:c.A2256G:p.G752G	Likely Benign
1CCC-a	40	AA	exonic	BRCA2	.	nonsynonymous SNV	BRCA2:NM_000059:exon11:c.A3098T:p.D1033V	VUS
1CCC-a	40	AA	exonic	CHEK2	.	synonymous SNV	CHEK2:NM_001257387:exon14:c.G744A:p.V248V;CHEK2:NM_001005735:exon14:c.G1536A:p.V512V;CHEK2:NM_001349956:exon12:c.G1206A:p.V402V;CHEK2:NM_145862:exon12:c.G1320A:p.V440V;CHEK2:NM_007194:exon13:c.G1407A:p.V469V	LIkely Benign
1CCC-a	40	AA	exonic;ncRNA_exonic	RAD51D;RAD51L3-RFFL	.	synonymous SNV	RAD51D:NM_133629:exon6:c.C537T:p.R179R;RAD51D:NM_001142571:exon9:c.C933T:p.R311R;RAD51D:NM_002878:exon9:c.C873T:p.R291R	LIkely Benign
1CCD-a	60	AA	exonic	BRIP1	.	synonymous SNV	BRIP1:NM_032043:exon20:c.C3069G:p.L1023L	Likely Benign
1CCD-a	60	AA	exonic	BRIP1	.	nonsynonymous SNV	BRIP1:NM_032043:exon7:c.C628T:p.P210S	VUS
1CCD-a	60	AA	exonic	CDH1	.	nonsynonymous SNV	CDH1:NM_001317186:exon12:c.A31C:p.N11H;CDH1:NM_001317185:exon13:c.A448C:p.N150H;CDH1:NM_001317184:exon12:c.A1813C:p.N605H;CDH1:NM_004360:exon13:c.A1996C:p.N666H	VUS
1CCD-a	60	AA	exonic	BRCA2	.	synonymous SNV	BRCA2:NM_000059:exon11:c.T2484C:p.Y828Y	Likely Benign
1CCG-a	39	AA	exonic;intronic	BRCA1	.	nonsynonymous SNV	BRCA1:NM_007297:exon9:c.G2978A:p.S993N;BRCA1:NM_007300:exon10:c.G3119A:p.S1040N;BRCA1:NM_007294:exon10:c.G3119A:p.S1040N	Likely Benign
1CCG-a	39	AA	exonic	NBN	.	nonsynonymous SNV	NBN:NM_001024688:exon8:c.G475A:p.A159T;NBN:NM_002485:exon7:c.G721A:p.A241T	VUS
1CCI-a	50	EA	exonic;intronic	BARD1	.	nonsynonymous SNV	BARD1:NM_001282543:exon3:c.A719G:p.D240G;BARD1:NM_000465:exon4:c.A776G:p.D259G	VUS
1CCI-a	50	EA	exonic;intronic;UTR5	CHEK2	NM_001257387:c.-5685T>C	nonsynonymous SNV	CHEK2:NM_001005735:exon5:c.T599C:p.I200T;CHEK2:NM_007194:exon4:c.T470C:p.I157T;CHEK2:NM_145862:exon4:c.T470C:p.I157T	Pathogenic
1CCJ-a	28	EA	exonic	BRCA2	.	nonsynonymous SNV	BRCA2:NM_000059:exon10:c.C1889T:p.T630I	Likely Benign
1CD-a	34	AA	exonic	BRCA2	.	nonsynonymous SNV	BRCA2:NM_000059:exon10:c.C1151T:p.S384F	Likely Benign
1CD-a	34	AA	exonic;intronic	BRCA1	.	synonymous SNV	BRCA1:NM_007297:exon9:c.A2355T:p.P785P;BRCA1:NM_007300:exon10:c.A2496T:p.P832P;BRCA1:NM_007294:exon10:c.A2496T:p.P832P	Likely Benign
1CE-a	51	AA	exonic;intronic	BRCA1	.	nonsynonymous SNV	BRCA1:NM_007297:exon9:c.A3028G:p.S1010G;BRCA1:NM_007300:exon10:c.A3169G:p.S1057G;BRCA1:NM_007294:exon10:c.A3169G:p.S1057G	VUS
1CF-a	60	AA	exonic	RAD51C	.	synonymous SNV	RAD51C:NM_058216:exon2:c.A186G:p.Q62Q;RAD51C:NM_002876:exon2:c.A186G:p.Q62Q	Likely Benign
1CF-a	60	AA	exonic;intronic	BRCA1	.	synonymous SNV	BRCA1:NM_007297:exon9:c.T1764C:p.N588N;BRCA1:NM_007300:exon10:c.T1905C:p.N635N;BRCA1:NM_007294:exon10:c.T1905C:p.N635N	Likely Benign
1CG-a	46	EA	exonic;intronic	ATM;C11orf65	.	nonsynonymous SNV	ATM:NM_000051:exon41:c.G6067A:p.G2023R	VUS
1EA-a	28	EA	exonic;intronic	ATM;C11orf65	.	nonsynonymous SNV	ATM:NM_000051:exon43:c.G6235A:p.V2079I	Likely Benign
1EA-a	28	EA	exonic	ATM	.	nonsynonymous SNV	ATM:NM_000051:exon5:c.T378A:p.D126E	Benign
1EA-a	28	EA	exonic	CHEK2	.	nonsynonymous SNV	CHEK2:NM_001005735:exon13:c.T1399C:p.Y467H;CHEK2:NM_007194:exon12:c.T1270C:p.Y424H;CHEK2:NM_145862:exon11:c.T1183C:p.Y395H;CHEK2:NM_001349956:exon11:c.T1069C:p.Y357H;CHEK2:NM_001257387:exon13:c.T607C:p.Y203H	VUS
1EAB-a	36	EA	exonic;UTR5	CHEK2	NM_001257387:c.-5924A>G	nonsynonymous SNV	CHEK2:NM_001005735:exon4:c.A478G:p.R160G;CHEK2:NM_007194:exon3:c.A349G:p.R117G;CHEK2:NM_145862:exon3:c.A349G:p.R117G;CHEK2:NM_001349956:exon3:c.A349G:p.R117G	Likely Pathogenic
1EAB-a	36	EA	exonic	RAD51C	.	nonsynonymous SNV	RAD51C:NM_058216:exon2:c.G376A:p.A126T;RAD51C:NM_002876:exon2:c.G376A:p.A126T	Likely Benign
1EAC-a	50	EA	exonic	ATM	.	synonymous SNV	ATM:NM_000051:exon13:c.T1986C:p.F662F	Benign
1EAC-a	50	EA	exonic;intronic	BRCA1	.	nonsynonymous SNV	BRCA1:NM_007300:exon10:c.A4039G:p.R1347G;BRCA1:NM_007294:exon10:c.A4039G:p.R1347G;BRCA1:NM_007297:exon9:c.A3898G:p.R1300G	Likely Benign
1EAD-a	40	EA	exonic	ATM	.	nonsynonymous SNV	ATM:NM_000051:exon11:c.T1744C:p.F582L	Likely Benign
1EAG-a	44	AA	exonic;intronic	BRCA1	.	nonsynonymous SNV	BRCA1:NM_007297:exon9:c.A2881G:p.M961V;BRCA1:NM_007300:exon10:c.A3022G:p.M1008V;BRCA1:NM_007294:exon10:c.A3022G:p.M1008V	Likely Benign
1EAH-a	40	AA	exonic	RAD51C	.	nonsynonymous SNV	RAD51C:NM_058216:exon2:c.G376A:p.A126T;RAD51C:NM_002876:exon2:c.G376A:p.A126T	Likely Benign
1EAH-a	40	AA	exonic	BRCA2	.	synonymous SNV	BRCA2:NM_000059:exon16:c.G7626A:p.T2542T	Likely Benign
1EAJ-a	35	EA	exonic	NBN	.	synonymous SNV	NBN:NM_001024688:exon5:c.T135C:p.A45A;NBN:NM_002485:exon4:c.T381C:p.A127A	Likely Benign
1EBA-a	53	AA	exonic;UTR3	TP53	NM_001276699:c.*115T>G;NM_001126114:c.*203T>G;NM_001126113:c.*115T>G;NM_001276696:c.*203T>G;NM_001276695:c.*115T>G;NM_001276698:c.*203T>G;NM_001126116:c.*203T>G;NM_001126117:c.*115T>G	nonsynonymous SNV	TP53:NM_001126112:exon10:c.T1096G:p.S366A;TP53:NM_001276760:exon10:c.T979G:p.S327A;TP53:NM_001276697:exon6:c.T619G:p.S207A;TP53:NM_000546:exon10:c.T1096G:p.S366A;TP53:NM_001276761:exon10:c.T979G:p.S327A;TP53:NM_001126115:exon6:c.T700G:p.S234A;TP53:NM_001126118:exon9:c.T979G:p.S327A	VUS
1EBE-a	48	EA	exonic;intronic;ncRNA_intronic	RAD51D;RAD51L3-RFFL	.	nonsynonymous SNV	RAD51D:NM_001142571:exon3:c.A269G:p.D90G	Likely Benign
1EBF-a	51	EA	exonic	CDH1	.	synonymous SNV	CDH1:NM_001317186:exon15:c.C669T:p.G223G;CDH1:NM_004360:exon16:c.C2634T:p.G878G;CDH1:NM_001317184:exon15:c.C2451T:p.G817G;CDH1:NM_001317185:exon16:c.C1086T:p.G362G	Likely Benign
1EBF-a	51	EA	exonic;UTR5	CDH1	NM_001317186:c.-1243C>T	synonymous SNV	CDH1:NM_004360:exon12:c.C1896T:p.H632H;CDH1:NM_001317184:exon11:c.C1713T:p.H571H;CDH1:NM_001317185:exon12:c.C348T:p.H116H	Likely Benign
1EBG-a	37	EA	exonic	BRIP1	.	nonsynonymous SNV	BRIP1:NM_032043:exon15:c.A2236G:p.I746V	Likely Benign
1EBI-a	36	EA	exonic	BRCA2	.	nonsynonymous SNV	BRCA2:NM_000059:exon18:c.G8149T:p.A2717S	Likely Benign
1EBI-a	36	EA	exonic;UTR5	NBN	NM_001024688:c.-1322delC	frameshift deletion	NBN:NM_002485:exon2:c.123delC:p.I41fs	Pathogenic
1EC-a	23	AA	exonic;intronic	BARD1	.	nonframeshift deletion	BARD1:NM_000465:exon4:c.1075_1095del:p.359_365del;BARD1:NM_001282543:exon3:c.1018_1038del:p.340_346del	Benign
1EC-a	23	AA	exonic	TP53	.	nonsynonymous SNV	TP53:NM_001126112:exon8:c.C844T:p.R282W;TP53:NM_001126116:exon4:c.C448T:p.R150W;TP53:NM_001126113:exon8:c.C844T:p.R282W;TP53:NM_001276760:exon8:c.C727T:p.R243W;TP53:NM_001276697:exon4:c.C367T:p.R123W;TP53:NM_001276695:exon8:c.C727T:p.R243W;TP53:NM_001276699:exon4:c.C367T:p.R123W;TP53:NM_000546:exon8:c.C844T:p.R282W;TP53:NM_001276761:exon8:c.C727T:p.R243W;TP53:NM_001276698:exon4:c.C367T:p.R123W;TP…	Pathogenic
1ECB-a	43	AA	exonic;intronic	BRCA1	.	nonframeshift deletion	BRCA1:NM_007297:exon9:c.1705_1707del:p.569_569del;BRCA1:NM_007300:exon10:c.1846_1848del:p.616_616del;BRCA1:NM_007294:exon10:c.1846_1848del:p.616_616del	VUS
1ECC-a	43	EA	exonic	ATM	.	nonsynonymous SNV	ATM:NM_000051:exon37:c.A5558T:p.D1853V	Likely Benign
1ECE-a	42	AA	exonic;intronic	BARD1	.	nonframeshift deletion	BARD1:NM_000465:exon4:c.1075_1095del:p.359_365del;BARD1:NM_001282543:exon3:c.1018_1038del:p.340_346del	Benign
1ECF-a	40	EA	exonic	ATM	.	synonymous SNV	ATM:NM_000051:exon3:c.T162C:p.Y54Y	Likely Benign
1ECF-a	40	EA	exonic	NBN	.	synonymous SNV	NBN:NM_001024688:exon5:c.T135C:p.A45A;NBN:NM_002485:exon4:c.T381C:p.A127A	Likely Benign
1ECG-a	49	AA	exonic	BRCA2	.	nonsynonymous SNV	BRCA2:NM_000059:exon11:c.2926_2927delinsAT:p.S976I	Likely Benign
1ECI-a	40	EA	exonic	BARD1	.	nonsynonymous SNV	BARD1:NM_001282548:exon5:c.C562T:p.R188C;BARD1:NM_001282549:exon4:c.C433T:p.R145C;BARD1:NM_001282543:exon9:c.C1915T:p.R639C;BARD1:NM_001282545:exon6:c.C619T:p.R207C;BARD1:NM_000465:exon10:c.C1972T:p.R658C	Likely Benign
1ECI-a	40	EA	exonic	BRCA2	.	stopgain	BRCA2:NM_000059:exon27:c.A9976T:p.K3326X	Likely Benign
1ECJ-a	45	AA	exonic	BRCA2	.	nonsynonymous SNV	BRCA2:NM_000059:exon11:c.2926_2927delinsAT:p.S976I	Likely Benign
1ECJ-a	45	AA	exonic	ATM	.	nonsynonymous SNV	ATM:NM_000051:exon12:c.C1810T:p.P604S	Likely Benign
1ECJ-a	45	AA	exonic	ATM	.	nonsynonymous SNV	ATM:NM_000051:exon19:c.A2887G:p.M963V	VUS
1ECJ-a	45	AA	exonic;intronic;ncRNA_intronic	RAD51D;RAD51L3-RFFL	.	nonsynonymous SNV	RAD51D:NM_001142571:exon3:c.T251A:p.L84H	Likely Benign
1ED-a	24	EA	exonic;intronic	BARD1	.	nonframeshift deletion	BARD1:NM_001282543:exon3:c.1018_1038del:p.340_346del;BARD1:NM_000465:exon4:c.1075_1095del:p.359_365del	Benign
1ED-a	24	EA	exonic	BRIP1	.	nonsynonymous SNV	BRIP1:NM_032043:exon6:c.C517T:p.R173C	Likely Benign
1EDB-a	57	AA	exonic;intronic	BARD1	.	synonymous SNV	BARD1:NM_000465:exon4:c.T1203C:p.S401S;BARD1:NM_001282543:exon3:c.T1146C:p.S382S	Likely Benign
1EDB-a	57	AA	exonic;UTR5	CHEK2	NM_001257387:c.-15054C>T	nonsynonymous SNV	CHEK2:NM_001005735:exon2:c.C254T:p.P85L;CHEK2:NM_001349956:exon2:c.C254T:p.P85L;CHEK2:NM_145862:exon2:c.C254T:p.P85L;CHEK2:NM_007194:exon2:c.C254T:p.P85L	VUS
1EDB-a	57	AA	exonic	BRCA2	.	synonymous SNV	BRCA2:NM_000059:exon3:c.T231G:p.T77T	Likely Benign
1EDC-a	56	AA	exonic	BRCA1	.	nonsynonymous SNV	BRCA1:NM_007297:exon14:c.C4541T:p.T1514I;BRCA1:NM_007298:exon14:c.C1370T:p.T457I;BRCA1:NM_007300:exon16:c.C4745T:p.T1582I;BRCA1:NM_007294:exon15:c.C4682T:p.T1561I;BRCA1:NM_007299:exon15:c.C1370T:p.T457I	Likely Benign
1EDC-a	56	AA	exonic	BRCA2	.	synonymous SNV	BRCA2:NM_000059:exon11:c.A4071C:p.L1357L	Likely Benign
1EDC-a	56	AA	exonic;intronic	BRCA1	.	nonsynonymous SNV	BRCA1:NM_007297:exon9:c.A2026G:p.N676D;BRCA1:NM_007300:exon10:c.A2167G:p.N723D;BRCA1:NM_007294:exon10:c.A2167G:p.N723D	Likely Benign
1EDC-a	56	AA	exonic	ATM	.	synonymous SNV	ATM:NM_000051:exon6:c.C609T:p.D203D	Likely Benign
1EDC-a	56	AA	exonic	BRCA2	.	nonsynonymous SNV	BRCA2:NM_000059:exon14:c.C7150A:p.Q2384K	Likely Benign
1EDD-a	50	AA	exonic	BRCA2	.	nonsynonymous SNV	BRCA2:NM_000059:exon10:c.C978A:p.S326R	Likely Benign
1EDE-a	46	EA	exonic	STK11	.	synonymous SNV	STK11:NM_000455:exon1:c.C264A:p.I88I	Likely Benign
1EDF-a	45	EA	exonic;intronic	BRCA1	.	nonsynonymous SNV	BRCA1:NM_007300:exon10:c.A4039G:p.R1347G;BRCA1:NM_007294:exon10:c.A4039G:p.R1347G;BRCA1:NM_007297:exon9:c.A3898G:p.R1300G	Likely Benign
1EDF-a	45	EA	exonic;UTR5	CHEK2	NM_001257387:c.-5934C>T	synonymous SNV	CHEK2:NM_001005735:exon4:c.C468T:p.Y156Y;CHEK2:NM_007194:exon3:c.C339T:p.Y113Y;CHEK2:NM_145862:exon3:c.C339T:p.Y113Y;CHEK2:NM_001349956:exon3:c.C339T:p.Y113Y	Likely Benign
1EDG-a	60	EA	exonic	BRCA2	.	synonymous SNV	BRCA2:NM_000059:exon11:c.G2919A:p.S973S	Likely Benign
1EDH-a	64	EA	exonic	BRCA2	.	nonsynonymous SNV	BRCA2:NM_000059:exon11:c.A6347G:p.H2116R	Likely Benign
1EDH-a	64	EA	exonic	NBN	.	synonymous SNV	NBN:NM_001024688:exon15:c.T1836G:p.P612P;NBN:NM_002485:exon14:c.T2082G:p.P694P	Benign
1EDH-a	64	EA	exonic	PALB2	.	nonsynonymous SNV	PALB2:NM_024675:exon2:c.A53G:p.K18R	Likely Benign
1EDH-a	64	EA	exonic	STK11	.	synonymous SNV	STK11:NM_000455:exon6:c.C816T:p.Y272Y	Likely Benign
1EDI-a	60	EA	exonic	BRCA2	.	nonsynonymous SNV	BRCA2:NM_000059:exon11:c.C6100T:p.R2034C	Likely Benign
1EDI-a	60	EA	exonic;intronic	ATM;C11orf65	.	nonsynonymous SNV	ATM:NM_000051:exon50:c.T7475G:p.L2492R	VUS
1EDJ-a	50	EA	exonic	BRCA2	.	synonymous SNV	BRCA2:NM_000059:exon11:c.G4068A:p.L1356L	Likely Benign
1EDJ-a	50	EA	exonic	PALB2	.	nonsynonymous SNV	PALB2:NM_024675:exon7:c.C2590T:p.P864S	Likely Benign
1EE-a	35	EA	exonic	ATM	.	nonsynonymous SNV	ATM:NM_000051:exon9:c.T1229C:p.V410A	VUS
1EEA-a	53	EA	exonic	BRCA2	.	nonsynonymous SNV	BRCA2:NM_000059:exon11:c.G4258T:p.D1420Y	Likely Benign
1EEA-a	53	EA	exonic;intronic	ATM;C11orf65	.	nonsynonymous SNV	ATM:NM_000051:exon42:c.A6103G:p.T2035A	VUS
1EEB-a	65	EA	exonic;intronic	BARD1	.	nonframeshift deletion	BARD1:NM_001282543:exon3:c.1018_1038del:p.340_346del;BARD1:NM_000465:exon4:c.1075_1095del:p.359_365del	Benign
1EEC-a	58	EA	exonic;intronic	BARD1	.	nonframeshift deletion	BARD1:NM_001282543:exon3:c.1018_1038del:p.340_346del;BARD1:NM_000465:exon4:c.1075_1095del:p.359_365del	Benign
1EEE-a	67	AA	exonic	ATM	.	nonsynonymous SNV	ATM:NM_000051:exon15:c.T2289A:p.F763L	VUS
1EEF-a	42	EA	exonic;UTR5	BRCA1	NM_007297:c.-17529C>T	synonymous SNV	BRCA1:NM_007300:exon2:c.C42T:p.V14V;BRCA1:NM_007298:exon1:c.C42T:p.V14V;BRCA1:NM_007294:exon2:c.C42T:p.V14V;BRCA1:NM_007299:exon2:c.C42T:p.V14V	Likely Benign
1EEF-a	42	EA	exonic	STK11	.	nonsynonymous SNV	STK11:NM_000455:exon5:c.G613A:p.A205T	VUS
1EEG-a	45	AA	exonic	BRCA2	.	nonsynonymous SNV	BRCA2:NM_000059:exon11:c.2926_2927delinsAT:p.S976I	Likely Benign
1EEG-a	45	AA	exonic	NBN	.	nonsynonymous SNV	NBN:NM_001024688:exon11:c.A1071G:p.I357M;NBN:NM_002485:exon10:c.A1317G:p.I439M	Likely Benign
1EEG-a	45	AA	exonic	ATM	.	nonsynonymous SNV	ATM:NM_000051:exon15:c.T2289A:p.F763L	VUS
1EEG-a	45	AA	exonic	PTEN	.	synonymous SNV	PTEN:NM_001304718:exon9:c.T513C:p.D171D;PTEN:NM_001304717:exon10:c.T1623C:p.D541D;PTEN:NM_000314:exon9:c.T1104C:p.D368D	Likely Benign
1EEI-a	52	EA	exonic	NBN	.	nonsynonymous SNV	NBN:NM_001024688:exon12:c.A1243G:p.T415A;NBN:NM_002485:exon11:c.A1489G:p.T497A	Likely Benign
1EEJ-a	70	EA	exonic	BARD1	.	frameshift deletion	BARD1:NM_001282548:exon6:c.738_739del:p.T246fs;BARD1:NM_001282549:exon5:c.609_610del:p.T203fs;BARD1:NM_001282543:exon10:c.2091_2092del:p.T697fs;BARD1:NM_001282545:exon7:c.795_796del:p.T265fs;BARD1:NM_000465:exon11:c.2148_2149del:p.T716fs	Pathogenic
1EEJ-a	70	EA	exonic	BRCA2	.	nonsynonymous SNV	BRCA2:NM_000059:exon3:c.G223C:p.A75P	Likely Benign
1EFA-a	61	EA	exonic	BRCA2	.	nonsynonymous SNV	BRCA2:NM_000059:exon11:c.G4258T:p.D1420Y	Likely Benign
1EFA-a	61	EA	exonic	BARD1	.	nonsynonymous SNV	BARD1:NM_001282548:exon5:c.C562T:p.R188C;BARD1:NM_001282549:exon4:c.C433T:p.R145C;BARD1:NM_001282543:exon9:c.C1915T:p.R639C;BARD1:NM_001282545:exon6:c.C619T:p.R207C;BARD1:NM_000465:exon10:c.C1972T:p.R658C	Likely Benign
1EFJ-a	68	EA	exonic	BRCA2	.	stopgain	BRCA2:NM_000059:exon27:c.A9976T:p.K3326X	Likely Benign
1EFJ-a	68	EA	exonic;UTR5	CDH1	NM_001317186:c.-1365G>A	nonsynonymous SNV	CDH1:NM_004360:exon12:c.G1774A:p.A592T;CDH1:NM_001317184:exon11:c.G1591A:p.A531T;CDH1:NM_001317185:exon12:c.G226A:p.A76T	Likely Benign
1EI-a	37	EA	exonic	CDH1	.	synonymous SNV	CDH1:NM_001317186:exon15:c.C669T:p.G223G;CDH1:NM_004360:exon16:c.C2634T:p.G878G;CDH1:NM_001317184:exon15:c.C2451T:p.G817G;CDH1:NM_001317185:exon16:c.C1086T:p.G362G	Likely Benign
1EI-a	37	EA	exonic;UTR5	CDH1	NM_001317186:c.-1243C>T	synonymous SNV	CDH1:NM_004360:exon12:c.C1896T:p.H632H;CDH1:NM_001317184:exon11:c.C1713T:p.H571H;CDH1:NM_001317185:exon12:c.C348T:p.H116H	Likely Benign
