# Supplementary material for: Gene panel screening for insight towards breast cancer susceptibility in different ethnicities
Source: PLoS One. 2020 Aug 31;15(8):e0238295. doi: 10.1371/journal.pone.0238295 (PMC7458311; doi:10.1371/journal.pone.0238295)
Supplement: S3 Table — (AA) African American; (Alt.) Alternate; (BC) Breast cancer; (Chr) Chromosome; (EA) European American; (#) esp6500siv2; (Het) Heterozygous; (MAF) minor allele frequency; (Ref.) Reference; (VUS) Variant of Uncertain Significance. (XLSX) [file pone.0238295.s003.xlsx]

## Sheet: S3 Table
S3 Table. Variants detected in multiple breast cancer cases.
Gene Name	Chr	Start position (hg38)	Ref. Allele	Alt. Allele	Exon	DNA Change	Amino Acid Change	Protein Function	ACMG Classification	EA MAF (%)#	AA MAF (%)#	Individual/Sample	Genotype	Ethnicity	Age of BC onset	P-value comparing the number of AA and EA cases with variant
ATM (NM_000051)	chr11	108257519	T	A	exon 15	c.2289T>A	p.F763L	Missense	VUS	.	0.14	1EEE-a	Het	AA	67	0.1278
												1EEG-a	Het	AA	45
BARD1 (NM_000465)	chr2	214730440	G	A	exon 10	c.1972C>T	p.R658C	Missense	Likely benign	0.78	0.23	1ECI-a	Het	EA	40	0.5339
												1EFA-a	Het	EA	61
	chr2	214780779_ 214780799	TGGTGAAGAACATTCAGGCAA	-	exon 4	c.1075_ 1095del	p.359_365del	Non-frameshifting deletion	Benign	.	.	1CAH-a	Het	AA	43	0.6641
												1EC-a	Het	AA	23
												1ECE-a	Het	AA	42
												1ED-a	Het	EA	24
												1EEB-a	Het	EA	65
												1EEC-a	Het	EA	58
BRCA1 (NM_007300)	chr17	43091492	T	C	exon 10	c.4039A>G	p.R1347G	Missense	Likely benign	0.67	0.11	1EAC-a	Het	EA	50	0.5339
												1EDF-a	Het	EA	45
BRCA2 (NM_000059)	chr13	32337281_32337282	TC	AT	exon 11	c.2926_2927delinsAT	p.S976I	Missense	Likely benign	.	.	1ECJ-a	Het	AA	45	0.04439
												1ECG-a	Het	AA	49
												1EEG-a	Het	AA	45
	chr13	32338613	G	T	exon 11	c.4258G>T	p.D1420Y	Missense	Likely benign	0.54	0.12	1EEA-a	Het	EA	53	0.5339
												1EFA-a	Het	EA	61
	chr13	32340702	A	G	exon 11	c.6347A>G	p.H2116R	Missense	Likely benign	0.05	0.95	1EDH-a	Het	EA	64	1
												1CBA-a	Het	AA	51
	chr13	32398489	A	T	exon 27	c.9976A>T	p.K3326X	Truncation	Likely benign	0.84	0.27	1CCA-a	Het	EA	43	0.5511
												1ECI-a	Het	EA	40
												1EFJ-a	Het	EA	68
CDH1 (NM_004360)	chr16	68801830	A	G	exon 3	c.324A>G	p.R108R	Synonymous	Likely benign	0.03	0.61	1CAF-a	Het	AA	50	0.1278
												1CBH-a	Het	AA	32
	chr16	68822185	C	T	exon 12	c.1896C>T	p.H632H	Synonymous	Likely benign	0.94	5.41	1EBF-a	Het	EA	51	0.5339
												1EI-a	Het	EA	37
	chr16	68833484	C	T	exon 16	c.2634C>T	p.G878G	Synonymous	Likely benign	0.88	3.89	1EBF-a	Het	EA	51	0.5339
												1EI-a	Het	EA	37
NBN (NM_002485)	chr8	89980833	A	G	exon 4	c.381T>C	p.A127A	Synonymous	Likely benign	0.45	0.18	1EAJ-a	Het	EA	35	0.5339
												1ECF-a	Het	EA	40
PALB2 (NM_024675)	chr16	23629898	T	C	exon 5	c.2256A>G	p.G752G	Synonymous	Likely benign	.	0.55	1CBA-a	Het	AA	51	0.1278
												1CCB-a	Het	AA	43
RAD51C (NM_058216)	chr17	58695161	G	A	exon 2	c.376G>A	p.A126T	Missense	Likely benign	0.64	0.11	1CAB-a	Het	EA	60	1
												1EAB-a	Het	EA	36
												1EAH-a	Het	AA	40
RAD51D (NM_001142571)	chr17	35116931	A	T	exon 3	c.251T>A	p.L84H	Missense	Likely benign	.	0.0026	1CAH-a	Het	AA	43	0.1278
												1ECJ-a	Het	AA	45
(AA) African American; (Alt.) Alternate; (BC) Breast cancer; (Chr) Chromosome; (EA) European American; (#) esp6500siv2; (Het) Heterozygous; (MAF) minor allele frequency; (Ref.) Reference; (VUS) Variant of Uncertain Significance.
